# Supplementary material
Source: HighWire-hosted journal article supplement (https://bmjopen.bmj.com/content/11/3/e044624)
Supplement: inline-supplementary-material-1 [file inline-supplementary-material-1.pdf]

**Appendix S1.** Search strategy

| Database       | PICO                             | No | proposed search terms                                                                                                                                                                                                                                                                                                                                                                                                                                                                                                                                                                                                                                                                                                 |
|----------------|----------------------------------|----|-----------------------------------------------------------------------------------------------------------------------------------------------------------------------------------------------------------------------------------------------------------------------------------------------------------------------------------------------------------------------------------------------------------------------------------------------------------------------------------------------------------------------------------------------------------------------------------------------------------------------------------------------------------------------------------------------------------------------|
| PubMed/MEDLINE | Population                       | 1  | ((((((((((child[Title/Abstract]) OR (Children[Title/Abstract])) OR (adolescence[Title/Abstract]) OR (adolescent[Title/Abstract]) OR (adolescents[Title/Abstract]) OR (teen*[Title/Abstract]) OR ("School Age Children"[Title/Abstract]) OR ("preschool children"[Title/Abstract]) OR (adolescent[MeSH Terms]) OR (child[MeSH Terms]) OR (child, preschool[MeSH Terms])))                                                                                                                                                                                                                                                                                                                                              |
|                | Index                            | 2  | (("mid upper arm circumference"[Title/Abstract]) OR (MUAC[Title/Abstract]))                                                                                                                                                                                                                                                                                                                                                                                                                                                                                                                                                                                                                                           |
|                | Comparator or Reference Standard | 3  | ((((((((((((((((((BMI[Title/Abstract]) OR ("body mass index"[Title/Abstract]) OR ("weight to height"[Title/Abstract]) OR ("dual energy X-ray absorptiometry"[Title/Abstract]) OR ("bioelectrical impedance"[Title/Abstract]) OR ("air-displacement plethysmography"[Title/Abstract]) OR ("Skinfold Thickness"[Title/Abstract]) OR (Electric Impedance[Title/Abstract]) OR (Densitometry[Title/Abstract]) OR (hydrodensitometry[Title/Abstract]) OR (body mass index[MeSH Terms]) OR ("pediatric obesity/diagnosis"[MeSH Terms]) OR ("pediatric obesity/diagnosis"[MeSH Major Topic]) OR (Obesity/diagnosis[MeSH Major Topic]) OR ("overweight/diagnosis"[MeSH Major Topic]) OR ("overweight/diagnosis"[MeSH Terms]))) |
|                | Outcome                          | 4  | (((((obese[Title/Abstract]) OR (obesity[Title/Abstract]) OR (overweight[Title/Abstract]) OR ("over weight"[Title/Abstract]) OR ("elevated body mass index"[Title/Abstract])))                                                                                                                                                                                                                                                                                                                                                                                                                                                                                                                                         |
|                |                                  | 6  | #1 AND #2 AND #3 AND #4                                                                                                                                                                                                                                                                                                                                                                                                                                                                                                                                                                                                                                                                                               |
